# Supplementary material for: The downside of dispersity: why the standard deviation is a better measure of dispersion in precision polymerization
Source: Royal Society of Chemistry journal article supplement (doi:10.1039/c8py00138c), 2018-01-01
Supplement: c8py00138c1.pdf [file c8py00138c1.pdf]

## Supporting information for 'The Downside of Dispersity: Why the Standard Deviation is a More Intuitive Measure of Dispersion in Precision Polymerization'

Simon Harrison

Derivation of the expression for dispersity in terms of standard deviation and mean.

In a polymer molecular weight distribution, in which  $x$  is the degree of polymerization, and  $f(x)$  is the frequency of chains of length  $x$ , normalized such that  $\sum f(x) = 1$ , the number and weight average degrees of polymerization  $DP_n$  and  $DP_w$  are defined as follows:

$$DP_n = \mu = \frac{\sum xf(x)}{\sum f(x)}$$
$$DP_w = \frac{\sum x^2f(x)}{\sum xf(x)}$$

Their ratio gives the dispersity,  $\mathfrak{D}$ :

$$\mathfrak{D} = \frac{DP_w}{DP_n} = \frac{\sum x^2f(x) \cdot \sum f(x)}{(\sum xf(x))^2}$$

The standard deviation,  $\sigma$ , is defined as the root mean square difference from the mean, giving:

$$\sigma^2 = \sum (x - \mu)^2 f(x)$$

Expanding the sum gives:

$$\sigma^2 = \sum x^2f(x) - 2\mu \sum xf(x) + \mu^2 \sum f(x) = \sum x^2f(x) - \mu^2$$

This is the well-known expression for the variance as the mean of the squares minus the square of the mean.

Substituting this formula into the expression for  $\mathfrak{D}$  gives:

$$\mathfrak{D} = \frac{DP_w}{DP_n} = \frac{\mu^2 + \sum x^2f(x) - \mu^2}{\mu^2} = 1 + \frac{\sigma^2}{\mu^2}$$
